# Supplementary material for: Efficacy and Safety of Daridorexant in Older and Younger Adults with Insomnia Disorder: A Secondary Analysis of a Randomised Placebo-Controlled Trial
Source: PubMed Central journal article supplement — Drugs Aging. 2022 Sep 13;39(10):795–810. doi: 10.1007/s40266-022-00977-4 (PMC9553778; doi:10.1007/s40266-022-00977-4), 2022-09-13
Supplement: 40266_2022_977_MOESM1_ESM.pdf [file 40266_2022_977_MOESM1_ESM.pdf]

## SUPPLEMENTARY INFORMATION

### **Efficacy and safety of daridorexant in older and younger adults with insomnia disorder: a secondary analysis of a randomised placebo-controlled trial**

**Journal:** *Drugs and Aging*

Ingo Fietze,<sup>1,2</sup> Claudio L.A Bassetti,<sup>3</sup> David William Mayleben,<sup>4</sup> Scott Pain,<sup>5</sup> Dalma Seboek Kinter,<sup>5</sup> William Vaughn McCall<sup>6</sup>

<sup>1</sup>Center for Sleep Medicine, Charité, University Hospital Berlin, Berlin, Germany; <sup>2</sup>Department of Medicine, The Fourth People's Hospital of Guangyuan City, Guangyuan, China; <sup>3</sup>Department of Neurology, Inselspital, University of Bern, Bern, Switzerland; <sup>4</sup>CTI Clinical Research Center, Cincinnati, Ohio, United States of America; <sup>5</sup>Idorsia Pharmaceuticals Ltd, Allschwil, Switzerland; <sup>6</sup>Department of Psychiatry and Health Behavior, Medical College of Georgia, Augusta University, Augusta, Georgia, United States of America

#### **Corresponding author:**

William Vaughn McCall (ORCID: *0000-0001-5035-7858*)

Department of Psychiatry and Health Behavior, Medical College of Georgia, Augusta University, 997 St Sebastian Way; Augusta, Georgia, 30912. United States of America

Email: [Wmccall@augusta.edu](mailto:Wmccall@augusta.edu)

Tel number: 706-721-6719

**Figure S1.** Conceptual framework of the IDSIQ

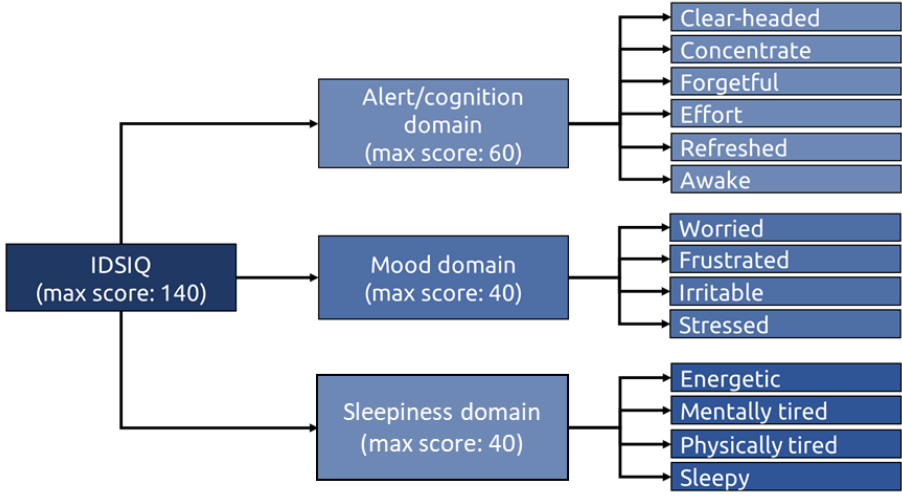

Figure reproduced with permission from Mignot E, et al. Lancet Neurol. 2022;21(2):125-39. IDSIQ, Insomnia Daytime Symptoms and Impacts Questionnaire

**Figure S2** Study flow and disposition of patients by age group

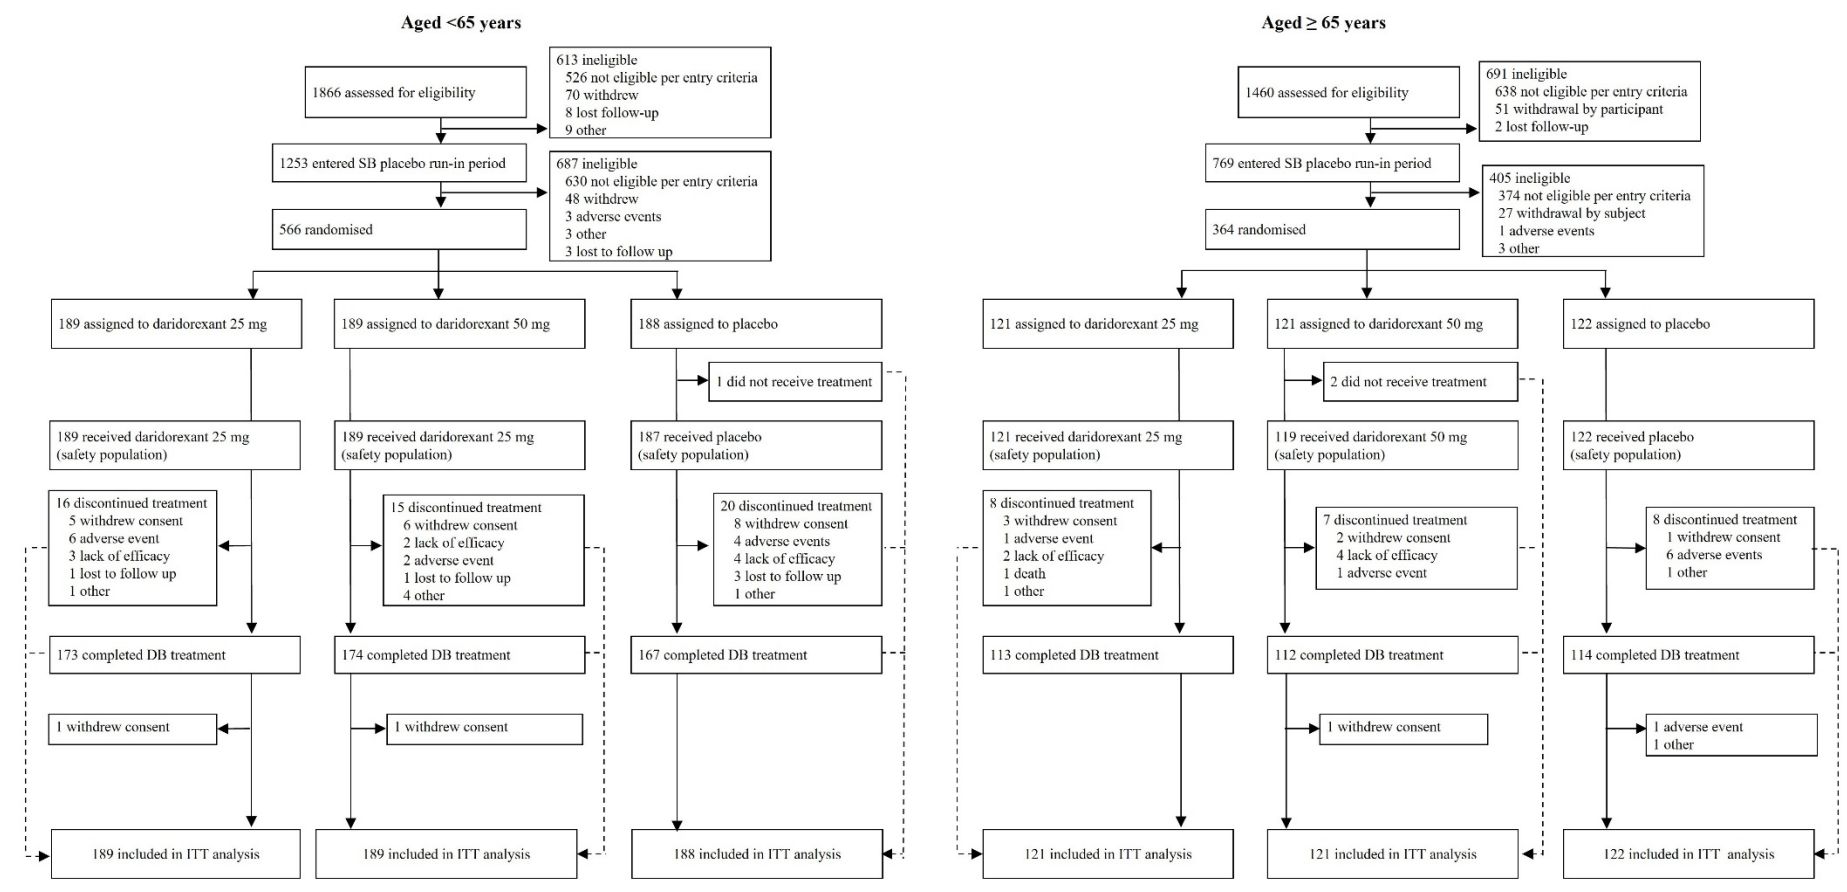

DB, double-blind; ITT, intention-to-treat; SB, single-blind

**Supplementary Table 1** Baseline demographics and insomnia characteristics by treatment group

| Characteristics                                                           | <65 years<br>N=566               |                                  |                    | ≥65 years<br>N=364               |                                  |                    |
|---------------------------------------------------------------------------|----------------------------------|----------------------------------|--------------------|----------------------------------|----------------------------------|--------------------|
|                                                                           | Daridorexant<br>50 mg<br>(n=189) | Daridorexant<br>25 mg<br>(n=189) | Placebo<br>(n=188) | Daridorexant<br>50 mg<br>(n=121) | Daridorexant<br>25 mg<br>(n=121) | Placebo<br>(n=122) |
| Sex, n (%)                                                                |                                  |                                  |                    |                                  |                                  |                    |
| Female                                                                    | 127 (67)                         | 127 (67)                         | 131 (70)           | 72 (60)                          | 88 (73)                          | 79 (65)            |
| Male                                                                      | 62 (33)                          | 62 (33)                          | 57 (30)            | 49 (40)                          | 33 (27)                          | 43 (35)            |
| Age at screening, years, mean (SD)                                        | 46.1 (12.0)                      | 46.6 (12.6)                      | 45.5 (12.0)        | 70.2 (4.4)                       | 70.0 (4.6)                       | 69.9 (4.1)         |
| Aged ≥75 years, n (%)                                                     | -                                | -                                | -                  | 19 (16)                          | 18 (15)                          | 17 (14)            |
| Race, n (%)                                                               |                                  |                                  |                    |                                  |                                  |                    |
| Caucasian                                                                 | 167 (88)                         | 167 (88)                         | 161 (86)           | 107 (88)                         | 120 (99)                         | 117 (96)           |
| Black/African                                                             | 18 (10)                          | 19 (10)                          | 23 (12)            | 12 (10)                          | 0                                | 5 (4)              |
| Asian                                                                     | 3 (2)                            | 3 (2)                            | 2 (1)              | 1 (1)                            | 0                                | 0                  |
| Other                                                                     | 1 (1)                            | 0                                | 2 (1)              | 1 (1)                            | 1 (1)                            | 0                  |
| US region, n (%)                                                          | 59 (31)                          | 66 (35)                          | 69 (37)            | 38 (31)                          | 33 (27)                          | 35 (29)            |
| BMI, kg/m <sup>2</sup> , mean (SD)                                        | 26.0 (4.5)                       | 26.5 (4.5)                       | 26.5 (4.4)         | 26.7 (3.9)                       | 26.9 (4.1)                       | 26.3 (3.6)         |
| Patients with ≥1 concomitant condition, n (%)                             | 112 (59)                         | 129 (68)                         | 110 (59)           | 98 (81)                          | 100 (83)                         | 97 (80)            |
| Most common condition (>10% of at least one group)                        |                                  |                                  |                    |                                  |                                  |                    |
| Hypertension                                                              | 17 (9)                           | 25 (13)                          | 19 (10)            | 46 (38)                          | 50 (41)                          | 50 (41)            |
| Hypercholesterolemia                                                      | 7 (4)                            | 9 (5)                            | 7 (4)              | 18 (15)                          | 19 (16)                          | 14 (11)            |
| Osteoarthritis                                                            | 5 (3)                            | 14 (7)                           | 11 (6)             | 9 (7)                            | 19 (16)                          | 15 (12)            |
| Patients with ≥1 concomitant medication <sup>a</sup> , n (%)              | 103 (54)                         | 117 (62)                         | 105 (56)           | 87 (73)                          | 88 (73)                          | 83 (68)            |
| No. medications/patient <sup>a</sup> , mean (SD)                          | 0.8 (1.4)                        | 1.1 (1.7)                        | 1.1 (1.6)          | 2.1 (2.2)                        | 2.1 (2.0)                        | 2.2 (2.4)          |
| Most common medications (>10% of at least one group) <sup>a</sup> , n (%) |                                  |                                  |                    |                                  |                                  |                    |
| Statins                                                                   | 2 (1)                            | 11 (6)                           | 7 (4)              | 22 (18)                          | 26 (21)                          | 27 (22)            |
| Beta blockers                                                             | 2 (1)                            | 16 (8)                           | 6 (3)              | 16 (13)                          | 18 (15)                          | 18 (15)            |
| ACE inhibitors                                                            | 5 (3)                            | 7 (4)                            | 8 (4)              | 15 (13)                          | 14 (12)                          | 22 (18)            |
| Antiplatelet agents, exc. heparin                                         | 1 (1)                            | 4 (2)                            | 4 (2)              | 15 (13)                          | 17 (14)                          | 16 (13)            |
| ARBs                                                                      | 6 (3)                            | 8 (4)                            | 6 (3)              | 17 (14)                          | 17 (14)                          | 12 (10)            |
| NSAIDs                                                                    | 32 (17)                          | 27 (14)                          | 30 (16)            | 10 (8)                           | 16 (13)                          | 15 (12)            |
| PPIs                                                                      | 7 (4)                            | 15 (8)                           | 9 (5)              | 14 (12)                          | 16 (13)                          | 9 (7)              |
| Thyroid hormones                                                          | 13 (7)                           | 17 (9)                           | 12 (6)             | 11 (9)                           | 13 (11)                          | 15 (12)            |
| Previous insomnia therapies <sup>a,b</sup> , n (%)                        |                                  |                                  |                    |                                  |                                  |                    |
| Non-benzodiazepine GABA-RA (Z-drugs)                                      | 2 (1)                            | 0                                | 0                  | 2 (2)                            | 2 (2)                            | 2 (2)              |
| Benzodiazepine GABA-RA                                                    | 1 (1)                            | 2 (1)                            | 0                  | 1 (1)                            | 2 (2)                            | 0                  |
| Other hypnotics and sedatives                                             | 1 (1)                            | 0                                | 1 (1)              | 0                                | 2 (2)                            | 2 (2)              |
| Other antidepressants <sup>c</sup>                                        | 2 (1)                            | 0                                | 2 (1)              | 2 (2)                            | 2 (2)                            | 0                  |
| WASO, min, mean (SD)                                                      | 87.1 (33.8)                      | 92.1 (39.6)                      | 95.7 (40.3)        | 108.6 (40.1)                     | 106.9 (35.7)                     | 112.9 (39.5)       |
| LPS, min, mean (SD)                                                       | 66.3 (40.8)                      | 68.8 (38.5)                      | 67.3 (37.3)        | 59.4 (30.9)                      | 64.9 (38.6)                      | 65.4 (43.4)        |
| TST, min, mean (SD)                                                       | 333.4 (51.4)                     | 326.4 (57.1)                     | 324.3 (53.9)       | 320.2 (47.3)                     | 316.3 (51.6)                     | 309.9 (54.3)       |
| sTST, min, mean (SD)                                                      | 315.3 (53.7)                     | 310.7 (59.6)                     | 316.8 (52.0)       | 309.8 (63.3)                     | 308.5 (61.1)                     | 314.4 (55.0)       |
| ISI score <sup>d</sup> , mean (SD)                                        | 19.6 (4.0)                       | 19.4 (4.5)                       | 19.6 (4.1)         | 18.8 (3.9)                       | 18.2 (4.0)                       | 18.6 (3.8)         |
| IDSIQ scores <sup>e</sup> mean (SD)                                       |                                  |                                  |                    |                                  |                                  |                    |
| IDSIQ sleepiness domain (0-40)                                            | 22.8 (7.1)                       | 23.0 (6.9)                       | 22.9 (6.8)         | 21.9 (7.4)                       | 20.7 (6.6)                       | 21.3 (7.1)         |
| IDSIQ mood domain (0-40)                                                  | 20.3 (8.3)                       | 20.3 (8.8)                       | 19.7 (8.9)         | 18.9 (8.9)                       | 17.6 (8.2)                       | 18.1 (8.4)         |
| IDSIQ alert/cognition domain (0-60)                                       | 33.0 (10.1)                      | 33.1 (10.0)                      | 33.3 (10.1)        | 31.2 (11.2)                      | 29.5 (9.8)                       | 30.5 (10.2)        |
| IDSIQ total score (0-140)                                                 | 76.1 (24.2)                      | 76.4 (24.7)                      | 75.9 (24.5)        | 72.0 (26.4)                      | 67.9 (23.5)                      | 69.9 (24.5)        |
| VAS scores <sup>f</sup> , mean (SD)                                       |                                  |                                  |                    |                                  |                                  |                    |
| VAS quality (0-100)                                                       | 34.5 (16.8)                      | 34.0 (18.4)                      | 33.5 (17.0)        | 38.9 (17.2)                      | 38.0 (16.6)                      | 38.9 (18.5)        |
| VAS depth (0-100)                                                         | 35.0 (17.1)                      | 34.0 (17.9)                      | 33.8 (17.3)        | 39.3 (17.8)                      | 37.6 (16.9)                      | 39.4 (18.8)        |
| VAS daytime alertness (0-100)                                             | 39.0 (20.1)                      | 37.1 (19.8)                      | 36.5 (19.6)        | 42.7 (19.5)                      | 44.5 (20.3)                      | 43.0 (20.3)        |
| VAS ability to function (0-100)                                           | 38.6 (18.9)                      | 38.2 (19.5)                      | 37.6 (19.4)        | 42.8 (19.9)                      | 44.5 (19.1)                      | 42.7 (19.7)        |
| VAS morning sleepiness <sup>a</sup> (0-100)                               | 36.7 (18.9)                      | 34.6 (18.5)                      | 33.9 (17.4)        | 40.1 (18.4)                      | 41.8 (18.5)                      | 42.2 (20.2)        |

Full analysis set, unless specified otherwise.

<sup>a</sup>Safety analysis set (<65 years: N=565; ≥65 years: N=362); <sup>b</sup>Per protocol, stopped before screening and only reported within the 30 days preceding the screening period; <sup>c</sup>Classification includes trazodone hydrochloride, mirtazapine, and trazodone; <sup>d</sup>ISI score 0–7 = absence of insomnia; 8–14 = sub-threshold insomnia; 15–21 = moderate insomnia; and 22–28 = severe insomnia [59];

<sup>e</sup>Lower IDSIQ scores indicate better patient-perceived daytime functioning; <sup>f</sup>Higher VAS scores indicate better outcome.

ACE, angiotensin-converting enzyme; ARBs, angiotensin receptor blockers; BMI, body mass index; GABA-RA, gamma-aminobutyric acid receptor agonist IDSIQ, Insomnia Daytime Symptoms and Impacts Questionnaire; ISI, Insomnia Severity Index; LPS, latency to persistent sleep; min, minutes; NSAIDs, non-steroidal anti-inflammatory drugs; PPIs, proton pump inhibitors; SD, standard deviation; sTST, subjective total sleep time; TST, total sleep time; VAS, Visual Analog Scale; WASO, wake after sleep onset.

**Supplementary Table 2** Effect of daridorexant on objective and subjective sleep parameters by age group

|                           | <65 years<br>N=566             |                                |                  | ≥65 years<br>N=364             |                                |                  |
|---------------------------|--------------------------------|--------------------------------|------------------|--------------------------------|--------------------------------|------------------|
|                           | Daridorexant<br>50 mg<br>n=189 | Daridorexant<br>25 mg<br>n=189 | Placebo<br>n=188 | Daridorexant<br>50 mg<br>n=121 | Daridorexant<br>25 mg<br>n=121 | Placebo<br>n=122 |
| <b>Sleep parameters</b>   |                                |                                |                  |                                |                                |                  |
| <b>WASO, min</b>          |                                |                                |                  |                                |                                |                  |
| Baseline, mean (SD)       | 87.1 (33.8)                    | 92.1 (39.6)                    | 95.7 (40.3)      | 108.6 (40.1)                   | 106.9 (35.7)                   | 112.9 (39.5)     |
| Month 1                   |                                |                                |                  |                                |                                |                  |
| LSM change from baseline  | -37.5                          | -25.0                          | -13.5            | -22.6                          | -14.4                          | -1.4             |
| 95% CI                    | -41.7, -33.2                   | -29.3, -20.7                   | -17.9, -9.2      | -29.2, -16.0                   | -21.1, -7.7                    | -8.0, 5.2        |
| SEM                       | 2.2                            | 2.2                            | 2.2              | 3.4                            | 3.4                            | 3.3              |
| LSM difference to placebo | -24.0                          | -11.5                          | -                | -21.2                          | -13.0                          | -                |
| 95% CI                    | -30.1, -17.8                   | -17.6, -5.4                    | -                | -30.5, -11.9                   | -22.4, -3.6                    | -                |
| SEM                       | -24.0                          | -11.5                          | -                | -21.2                          | -13.0                          | -                |
| Month 3                   |                                |                                |                  |                                |                                |                  |
| LSM change from baseline  | -38.9                          | -29.8                          | -21.5            | -21.4                          | -18.8                          | -1.8             |
| 95% CI                    | -43.6, -34.2                   | -34.4, -25.2                   | -26.3, -16.8     | -28.4, -14.3                   | -25.9, -11.7                   | -8.7, 5.2        |
| SEM                       | 2.4                            | 2.4                            | 2.4              | 3.6                            | 3.6                            | 3.6              |
| LSM difference to placebo | -17.4                          | -8.3                           | -                | -19.6                          | -17.0                          | -                |
| 95% CI                    | -24.0, -10.7                   | -14.9, -1.6                    | -                | -29.5, -9.7                    | -27.0, -7.0                    | -                |
| SEM                       | 3.4                            | 3.4                            | -                | 5.1                            | 5.1                            | -                |
| <b>LPS, min</b>           |                                |                                |                  |                                |                                |                  |
| Baseline, mean (SD)       | 66.3 (40.8)                    | 68.8 (38.5)                    | 67.3 (37.3)      | 59.4 (30.9)                    | 64.9 (38.6)                    | 65.4 (43.4)      |
| Month 1                   |                                |                                |                  |                                |                                |                  |
| LSM change from baseline  | -31.5                          | -30.2                          | -21.6            | -31.1                          | -25.4                          | -17.4            |
| 95% CI                    | -36.1, -27.0                   | -34.8, -25.6                   | -26.2, -17.0     | -35.8, -26.5                   | -30.1, -20.7                   | -22.0, -12.8     |
| SEM                       | 2.3                            | 2.3                            | 2.3              | 2.4                            | 2.4                            | 2.3              |
| LSM difference to placebo | -10.0                          | -8.6                           | -                | -13.7                          | -8.0                           | -                |
| 95% CI                    | -16.4, -3.5                    | -15.1, -2.1                    | -                | -20.2, -7.2                    | -14.5, -1.4                    | -                |
| SEM                       | 3.3                            | 3.3                            | -                | 3.3                            | 3.3                            | -                |
| Month 3                   |                                |                                |                  |                                |                                |                  |
| LSM change from baseline  | -35.7                          | -33.7                          | -26.0            | -33.8                          | -26.7                          | -18.9            |
| 95% CI                    | -39.9, -31.5                   | -37.9, -29.5                   | -30.3, -21.7     | -39.1, -28.6                   | -32.0, -21.4                   | -24.1, -13.7     |
| SEM                       | 2.1                            | 2.1                            | 2.1              | 2.7                            | 2.7                            | 2.6              |
| LSM difference to placebo | -9.7                           | -7.7                           | -                | -14.9                          | -7.8                           | -                |
| 95% CI                    | -15.7, -3.7                    | -13.7, -1.7                    | -                | -22.3, -7.5                    | -15.2, -0.4                    | -                |
| SEM                       | 3.1                            | 3.1                            | -                | 3.8                            | 3.8                            | -                |
| <b>sTST, min</b>          |                                |                                |                  |                                |                                |                  |
| Baseline, mean (SD)       | 315.3 (53.7)                   | 310.7 (59.6)                   | 316.8 (52.0)     | 309.8 (63.3)                   | 308.5 (61.1)                   | 314.4 (55.0)     |
| Month 1                   |                                |                                |                  |                                |                                |                  |
| LSM change from baseline  | 43.9                           | 38.3                           | 27.4             | 44.8                           | 29.9                           | 14.4             |
| 95% CI                    | 36.9, 51.0                     | 31.2, 45.4                     | 20.3, 34.5       | 36.5, 53.0                     | 21.5, 38.2                     | 6.2, 22.7        |
| SEM                       | 3.6                            | 3.6                            | 3.6              | 4.2                            | 4.2                            | 4.2              |
| LSM difference to placebo | 16.5                           | 10.9                           | -                | 30.3                           | 15.4                           | -                |
| 95% CI                    | 6.5, 26.6                      | 0.9, 21.0                      | -                | 18.7, 42.0                     | 3.7, 27.1                      | -                |
| SEM                       | 5.1                            | 5.1                            | -                | 5.9                            | 6.0                            | -                |
| Month 3                   |                                |                                |                  |                                |                                |                  |
| LSM change from baseline  | 57.1                           | 49.1                           | 44.8             | 59.9                           | 47.9                           | 29.3             |
| 95% CI                    | 48.9, 65.3                     | 40.9, 57.3                     | 36.5, 53.1       | 49.6, 70.3                     | 37.6, 58.3                     | 19.1, 39.5       |
| SEM                       | 4.2                            | 4.2                            | 4.2              | 5.3                            | 5.3                            | 5.2              |
| LSM difference to placebo | 12.4                           | 4.3                            | -                | 30.6                           | 18.7                           | -                |
| 95% CI                    | 0.7, 24.0                      | (-7.3, 16.0)                   | -                | 16.1, 45.2                     | 4.1, 33.2                      | -                |
| SEM                       | 5.9                            | 5.9                            | -                | 7.4                            | 7.4                            | -                |

Baseline data are presented as mean (SD). LSM change from baseline and LSM difference to placebo are presented as LSM (95% CI).

CI, confidence interval; LPS, latency to persistent sleep; LSM, least squares mean; SD, standard deviation; SEM, standard error of the mean; sTST, self-reported total sleep time; WASO, wake after sleep onset.
